# Supplementary material
Source: MDPI journal article supplement (https://www.mdpi.com/2379-139X/8/5/208)
Supplement: s1 [file s1]

**Supplementary Material.** Alternative Regression Analyses to determine Predictors of Sartorius Depth.

|                | Predictor Outcome    | <i>B</i> | SE <i>B</i> | 95% CI          | $\beta$ | <i>t</i> | <i>P</i> |
|----------------|----------------------|----------|-------------|-----------------|---------|----------|----------|
| Proximal-Third | Step 1               |          |             |                 |         |          |          |
|                | Gender               | 0.508    | 0.102       | (0.306; 0.709)  | 0.361   | 4.972    | <0.001   |
|                | Step 2               |          |             |                 |         |          |          |
|                | Gender               | 0.581    | 0.083       | (0.418; 0.744)  | 0.413   | 7.038    | <0.001   |
|                | Proximal-Third Girth | 0.057    | 0.006       | (0.045; .0068)  | 0.559   | 9.519    | <0.001   |
|                | Step 3               |          |             |                 |         |          |          |
|                | Gender               | 0.648    | 0.110       | (0.431; 0.864)  | 0.461   | 5.908    | <0.001   |
|                | Proximal-Third Girth | 0.056    | 0.006       | (0.044; 0.068)  | 0.549   | 9.181    | <0.001   |
|                | Height               | 0.545    | 0.587       | (-0.614; 1.705) | 0.074   | 0.929    | 0.354    |
| Mid-Third      | Step 1               |          |             |                 |         |          |          |
|                | Gender               | 0.438    | 0.103       | (0.236; 0.641)  | 0.316   | 4.275    | <0.001   |
|                | Step 2               |          |             |                 |         |          |          |
|                | Gender               | 0.508    | 0.085       | (0.340; 0.676)  | 0.366   | 5.968    | <0.001   |
|                | Proximal-Third Girth | 0.054    | 0.006       | (0.042; 0.066)  | 0.540   | 8.797    | <0.001   |
|                | Step 3               |          |             |                 |         |          |          |
|                | Gender               | 0.558    | 0.113       | (0.334; 0.782)  | 0.402   | 4.926    | <0.001   |
|                | Proximal-Third Girth | 0.053    | 0.006       | (0.041; 0.066)  | 0.532   | 8.509    | <0.001   |
|                | Height               | 0.406    | 0.607       | (-0.792; 1.604) | 0.056   | 0.669    | 0.504    |

Proximal-third sartorius depth:  $R^2$  adj. = 0.125 for step 1 ( $F = 24.725$ ;  $p < 0.001$ ),  $R^2$  adj. = 0.433 for step 2 ( $F = 64.377$ ;  $p < 0.001$ ),  $R^2$  adj. = 0.432 for step 3 ( $F = 43.170$ ;  $p < 0.001$ ).

Mid-third sartorius depth:  $R^2$  adj. = .100 for step 1 ( $F = 18.272$ ;  $p < 0.001$ ),  $R^2$  adj. = 0.388 for step 2 ( $F = 52.061$ ;  $p < 0.001$ ),  $R^2$  adj. = 0.390 for step 3 ( $F = 34.740$ ;  $p < 0.001$ ).
